# Supplementary material for: Transgenic Biofortification of the Starchy Staple Cassava (Manihot esculenta) Generates a Novel Sink for Protein
Source: PLOS journal article supplement (doi:10.1371/journal.pone.0016256), 2011-01-25
Supplement: S4 (10.1371/journal.pone.0016256.s004) [file journal.pone.0016256.s004]

| **GI. Acc #** | **Protein Identity** | **Source** | **Score** | **Peptide Coverage** |
| --- | --- | --- | --- | --- |
| 6272548 | Ribulose 1,5-bisphosphate carboxylase small chain precursor | *Manihot esculenta* | 179 | 27% |
| 6272548 | Ribulose 1,5-bisphosphate carboxylase small chain precursor | *Manihot esculenta* | 223 | 32% |
| 131974 | Ribulose bisphosphate carboxylase large chain (RuBisCO large subunit) | *Manihot esculenta* | 96 | 5% |
| 912576 | BiP | *Phaeodactylum tricornutum* | 279 | 37% |
| 22550386 | Beta-carbonic anhydrase | *Nicotiana tabacum* | 247 | 34% |
| 403594 | Phaseolin | *Phaseolus vulgaris* | 251 | 35% |
| 115473 | Carbonic anhydrase, chloroplastic | *Nicotiana tabacum* | 262 | 35% |
| 114421 | ATP synthase subunit beta, mitochondrial precursor | *Nicotiana tabacum* | 588 | 27% |
| 50058629 | F1-ATPase alpha subunit | *Nicotiana tabacum* | 298 | 17% |
| 8248034 | Inorganic phosphate transporter | *Nicotiana tabacum* | 201 | 10% |
| 6715512 | Vacuolar H+-ATPase B subunit | *Nicotiana tabacum* | 121 | 9% |
| 1352344 | Elongation factor 1-alpha (EF-1-alpha) | *Nicotiana tabacum* | 116 | 5% |
| 37625023 | Ribosomal protein L3A | *Nicotiana tabacum* | 74 | 4% |
| 10798640 | Mitochondrial 2-oxoglutarate/malate carrier protein | *Nicotiana tabacum* | 145 | 13% |
| 115463079 | Os05g0302700 | *Oryza sativa* | 120 | 9% |
| 3318611 | mitochondrial phosphate transporter | *Glycine max* | 110 | 9% |
| 1946329 | Prohibitin | *Nicotiana tabacum* | 103 | 14% |
| 22138108 | 40S ribosomal S4 protein | *Glycine max* | 98 | 7% |
| 81076111 | ADP,ATP carrier protein precursor-like | *Nicotiana tabacum* | 49 | 14% |
| 57336898 | Putative plasma membrane intrinsic protein | *Populus tremula* | 93 | 15% |
| 155029319 | ATP synthase beta subunit | *Speranskia cantonensis* | 56 | 5% |

Supplementary Table I: **Protein identity of eluted and digested protein bands from the SDS-PAGE (Fig. S2D and S2E).** All bands from figure S2D and S2E were eluted, digested, and analyzed by MS-ID as detailed in Materials and Methods. The table provides: GI Accession number for the blast result, Protein Identity, Source of the Protein, Score Identity to the aligned protein from the source organism, and Peptide Coverage percentage of the sequenced amino acids in the digested proteins compared to the source organism proteins.
